# Supplementary material for: Whole-genome Duplication Reshaped Adaptive Evolution in A Relict Plant Species, Cyclocarya paliurus
Source: PubMed Central journal article supplement (PMC10787019; doi:10.1016/j.gpb.2023.02.001), 2023-02-11

Inter-genomic comparison: PA vs. PG (30,536 gene pairs)

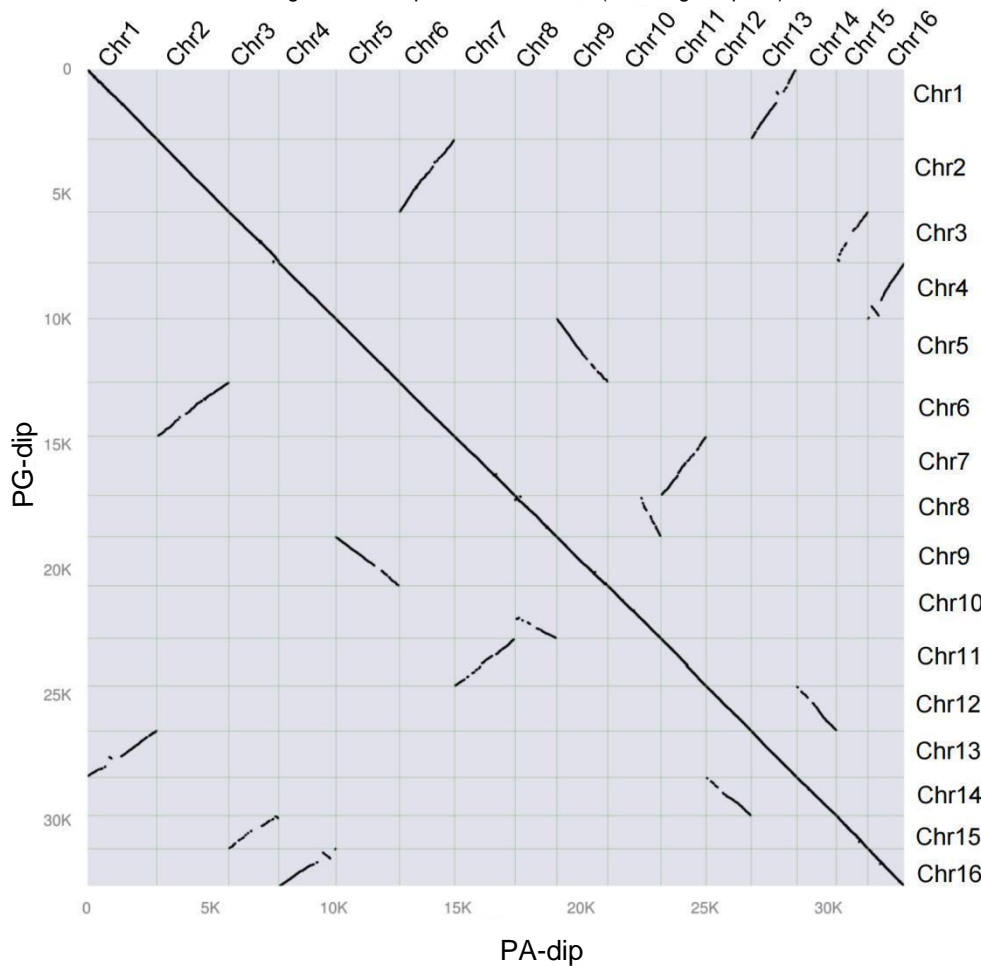

Supplement: mmc10.pdf [file mmc10.pdf]
