# Supplementary material for: Whole-genome Duplication Reshaped Adaptive Evolution in A Relict Plant Species, Cyclocarya paliurus
Source: PubMed Central journal article supplement (PMC10787019; doi:10.1016/j.gpb.2023.02.001), 2023-02-11

A

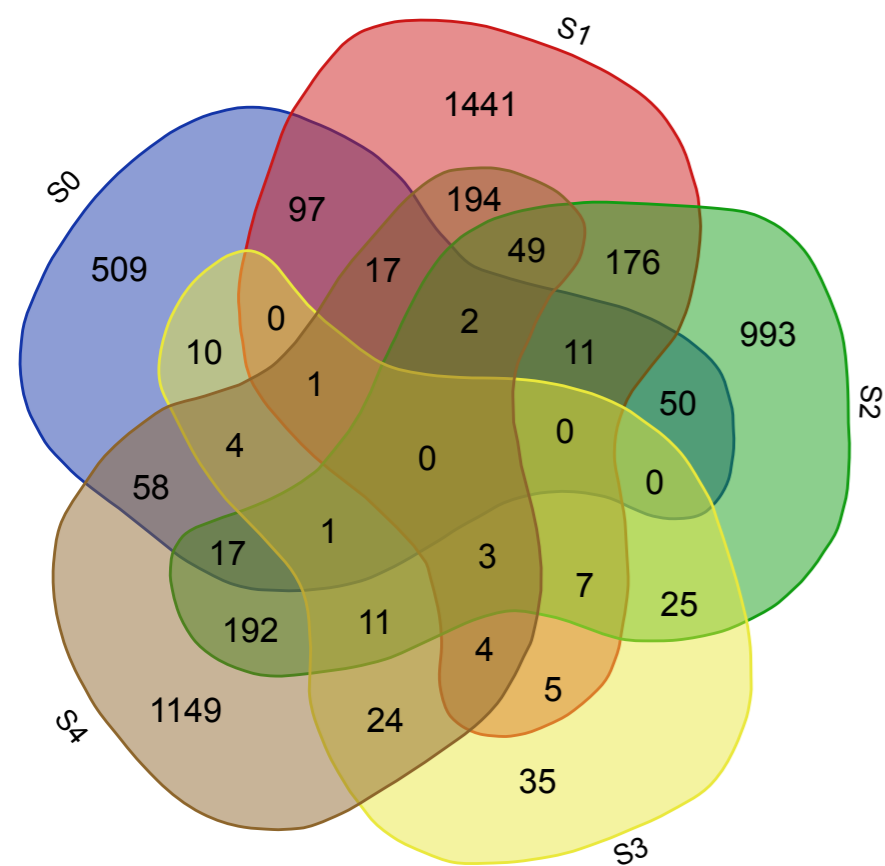

PG-F vs. PA-F

C

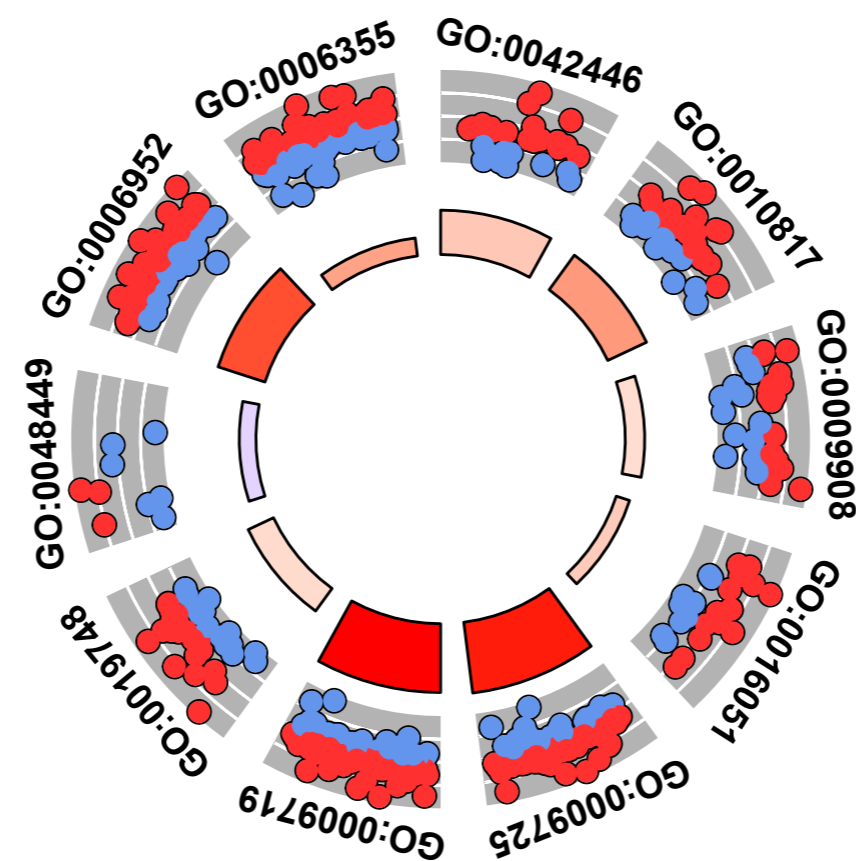

| ID         | Description                                |
|------------|--------------------------------------------|
| GO:0042446 | hormone biosynthetic process               |
| GO:0010817 | regulation of hormone levels               |
| GO:0009908 | flower development                         |
| GO:0016051 | carbohydrate biosynthetic process          |
| GO:0009725 | response to hormone                        |
| GO:0009719 | response to endogenous stimulus            |
| GO:0019748 | secondary metabolic process                |
| GO:0048449 | floral organ formation                     |
| GO:0006952 | defense response                           |
| GO:0006355 | regulation of transcription, DNA-templated |

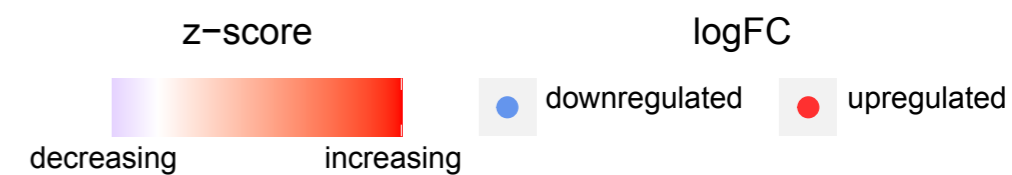

B

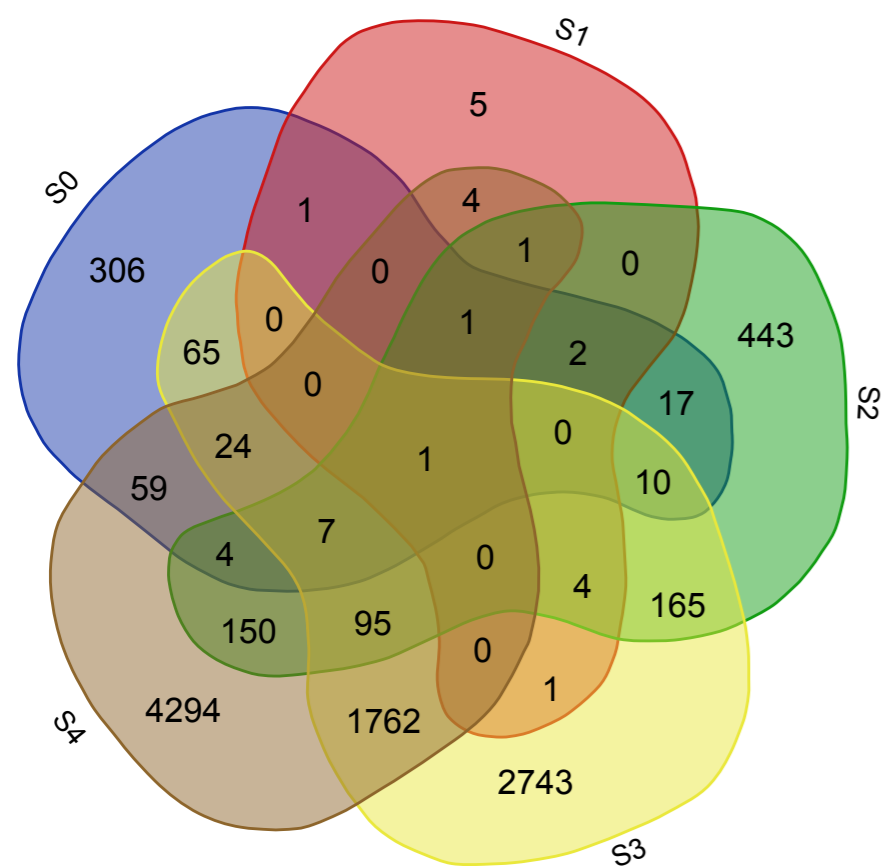

PA-M vs. PG-M

D

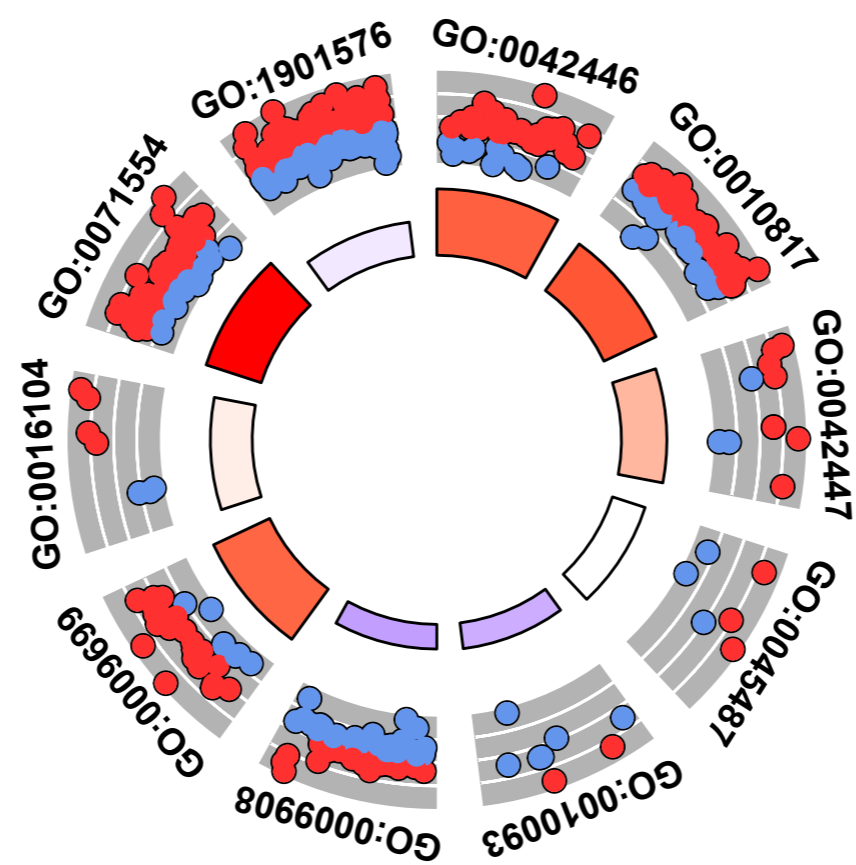

| ID         | Description                            |
|------------|----------------------------------------|
| GO:0042446 | hormone biosynthetic process           |
| GO:0010817 | regulation of hormone levels           |
| GO:0042447 | hormone catabolic process              |
| GO:0045487 | gibberellin catabolic process          |
| GO:0010093 | specification of floral organ identity |
| GO:0009908 | flower development                     |
| GO:0009699 | phenylpropanoid biosynthetic process   |
| GO:0016104 | triterpenoid biosynthetic process      |
| GO:0071554 | cell wall organization or biogenesis   |
| GO:1901576 | organic substance biosynthetic process |

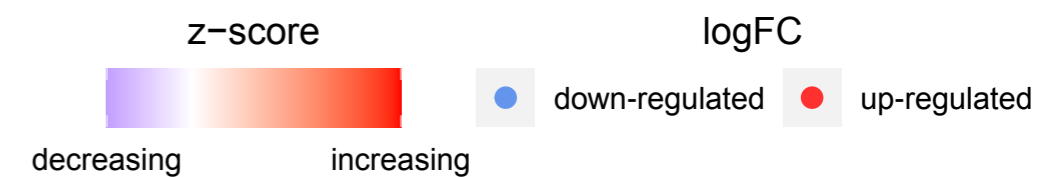

Supplement: mmc20.pdf [file mmc20.pdf]
