# Supplementary material for: Whole-genome Duplication Reshaped Adaptive Evolution in A Relict Plant Species, Cyclocarya paliurus
Source: PubMed Central journal article supplement (PMC10787019; doi:10.1016/j.gpb.2023.02.001), 2023-02-11

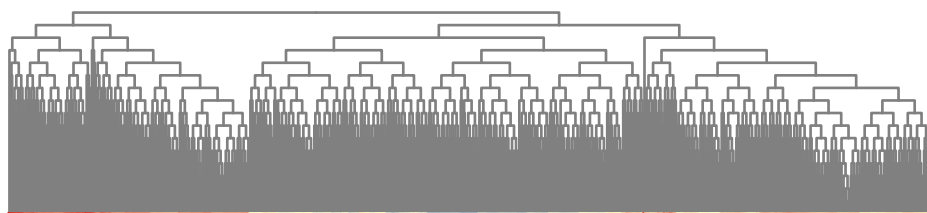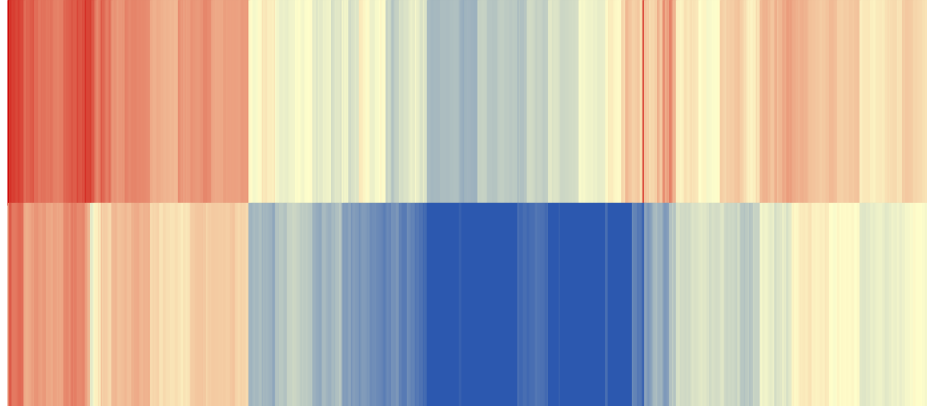

**Tetraploid**

**Diploid**

$\text{Log}_2\text{FPKM}$

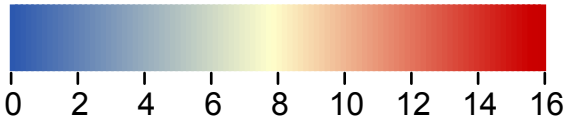

Supplement: mmc33.pdf [file mmc33.pdf]
