# Supplementary material for: Whole-genome Duplication Reshaped Adaptive Evolution in A Relict Plant Species, Cyclocarya paliurus
Source: PubMed Central journal article supplement (PMC10787019; doi:10.1016/j.gpb.2023.02.001), 2023-02-11

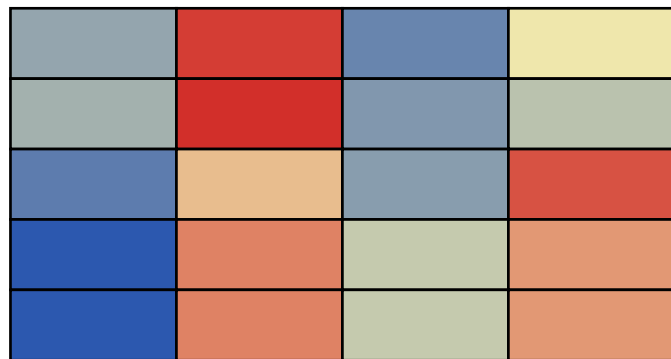

CpaM1st43853 (CA)

CpaM1st11264 (PPCK)

CpaM1st33194 (Rubisco)

CpaM1st03441 (FBP)

CpaM1st03441 (SBPASE)

Sept\_diploid

Sept\_tetraploid

May\_diploid

May\_diploid

FPKM (Z-score)

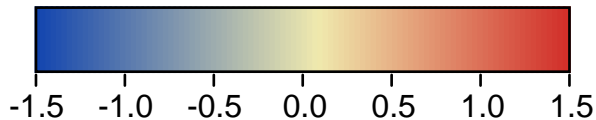

Supplement: mmc35.pdf [file mmc35.pdf]
