# Supplementary material for: Whole-genome Duplication Reshaped Adaptive Evolution in A Relict Plant Species, Cyclocarya paliurus
Source: PubMed Central journal article supplement (PMC10787019; doi:10.1016/j.gpb.2023.02.001), 2023-02-11

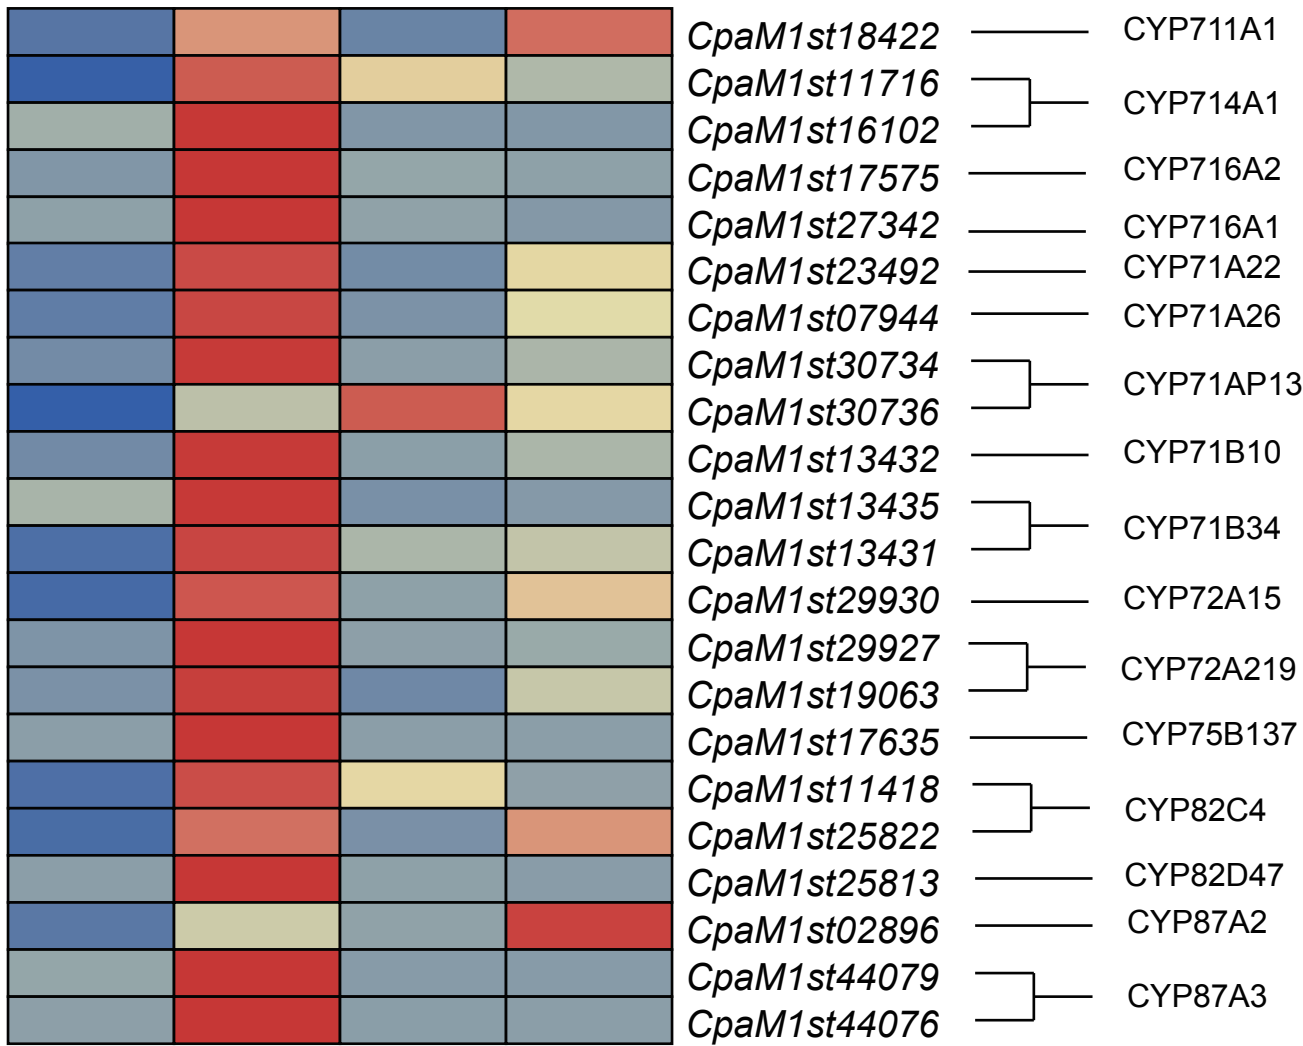

Sept\_diploid

Sept\_tetraploid

May\_diploid

May\_tetraploid

FPKM (Z-score)

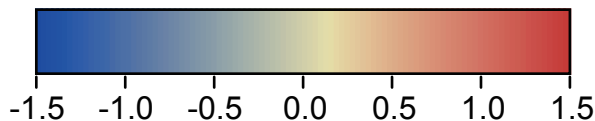

Supplement: mmc37.pdf [file mmc37.pdf]
