# Supplementary material for: Whole-genome Duplication Reshaped Adaptive Evolution in A Relict Plant Species, Cyclocarya paliurus
Source: PubMed Central journal article supplement (PMC10787019; doi:10.1016/j.gpb.2023.02.001), 2023-02-11

# GO enrichment

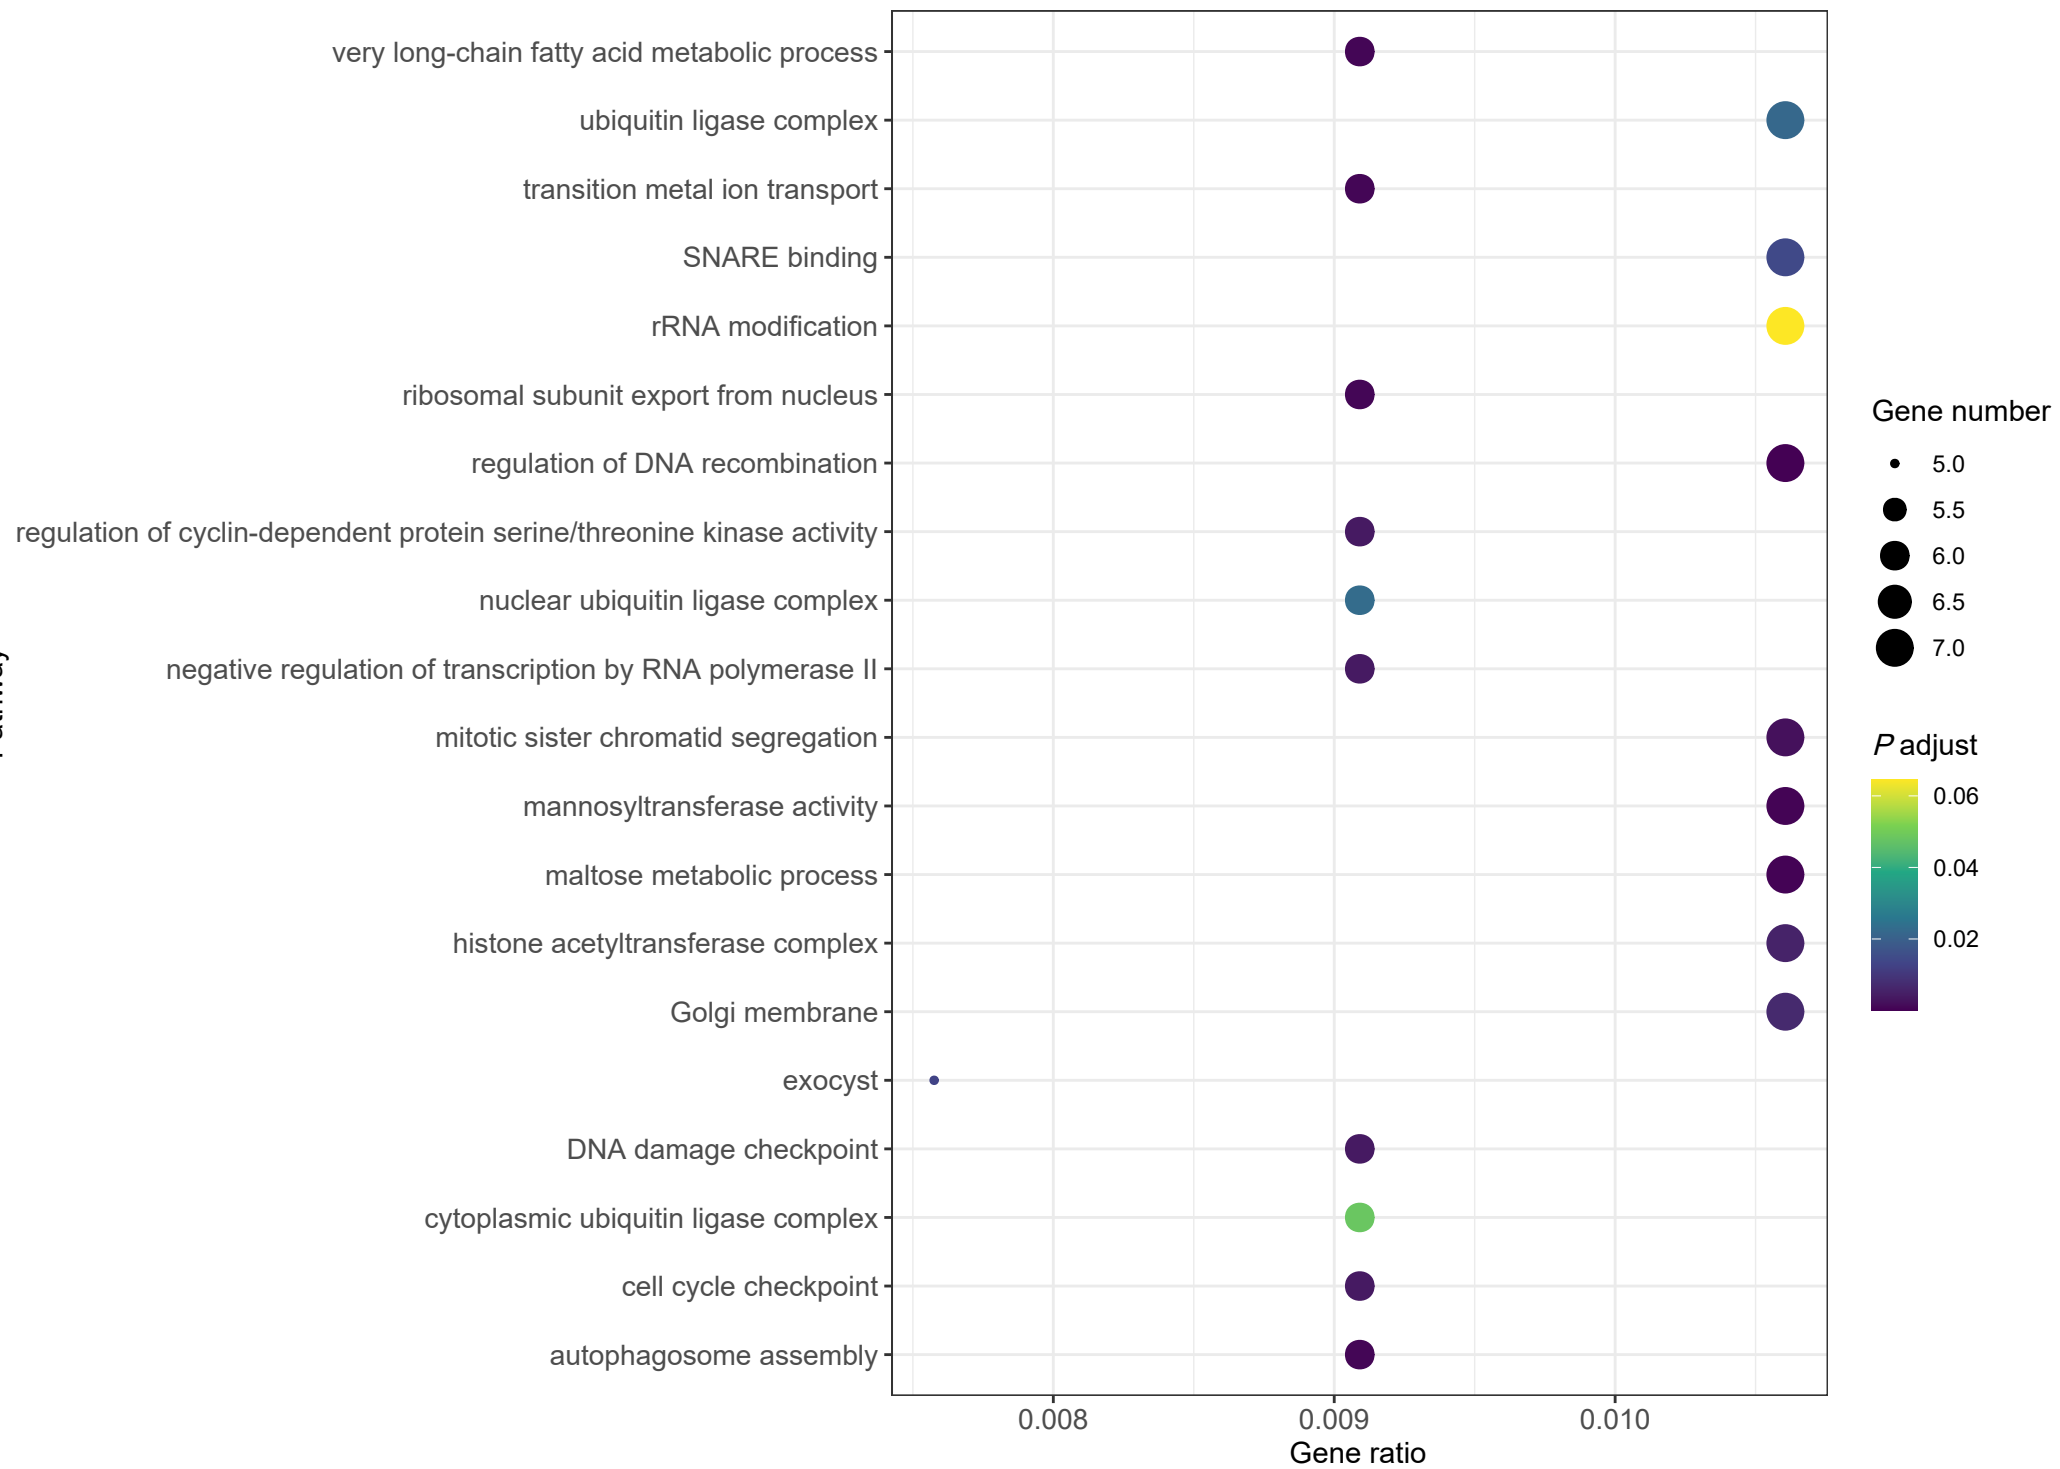

Supplement: mmc40.pdf [file mmc40.pdf]
