# Supplementary material for: Whole-genome Duplication Reshaped Adaptive Evolution in A Relict Plant Species, Cyclocarya paliurus
Source: PubMed Central journal article supplement (PMC10787019; doi:10.1016/j.gpb.2023.02.001), 2023-02-11
Supplement: mmc44.pdf [file mmc44.pdf]

Tetraploid

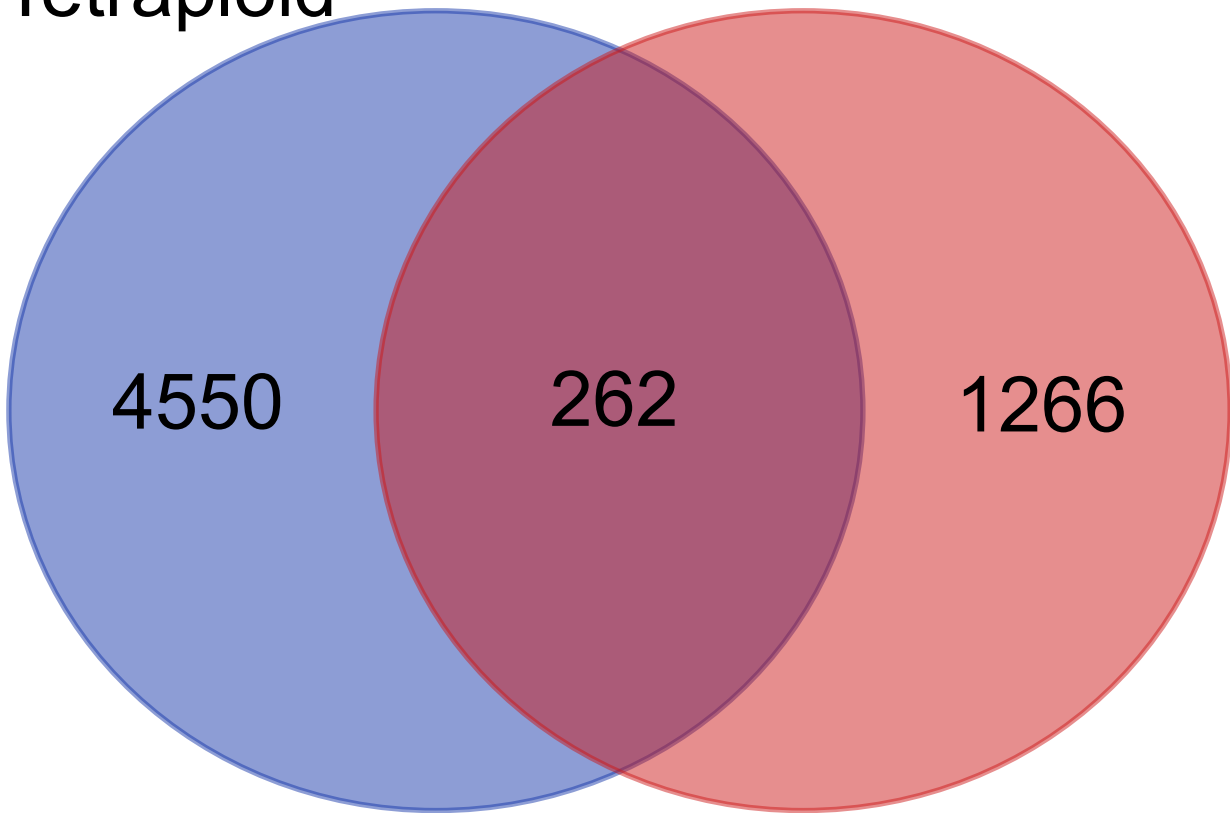

4550

262

1266

Diploid
