# Supplementary material for: Whole-genome Duplication Reshaped Adaptive Evolution in A Relict Plant Species, Cyclocarya paliurus
Source: PubMed Central journal article supplement (PMC10787019; doi:10.1016/j.gpb.2023.02.001), 2023-02-11
Supplement: mmc45.pdf [file mmc45.pdf]

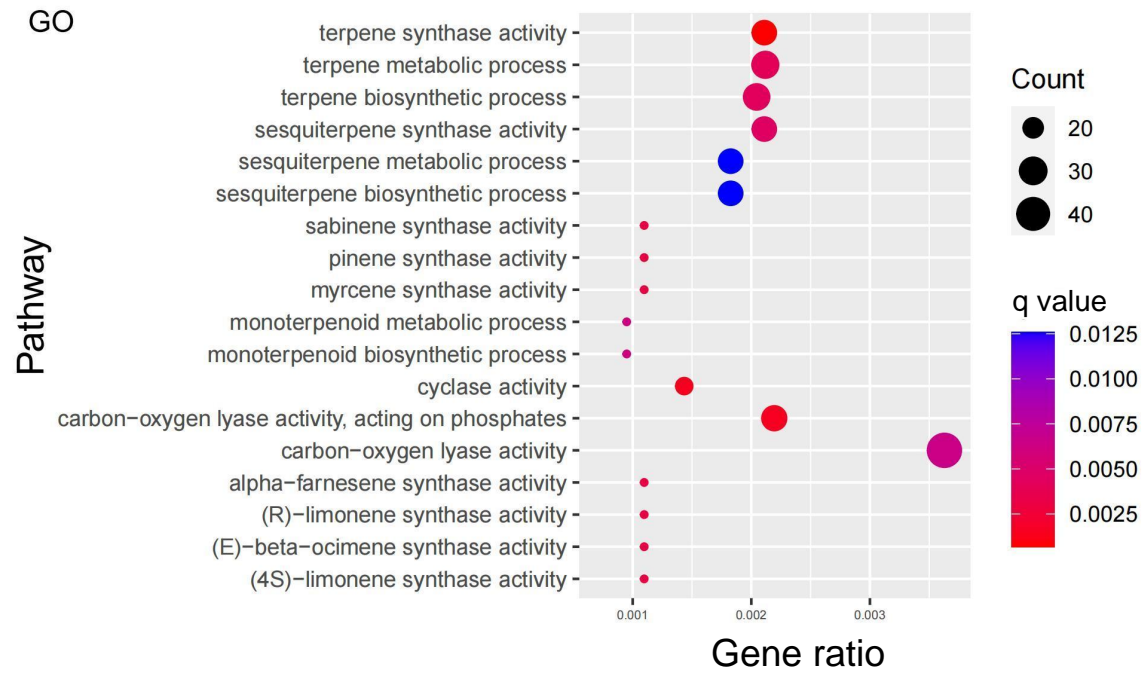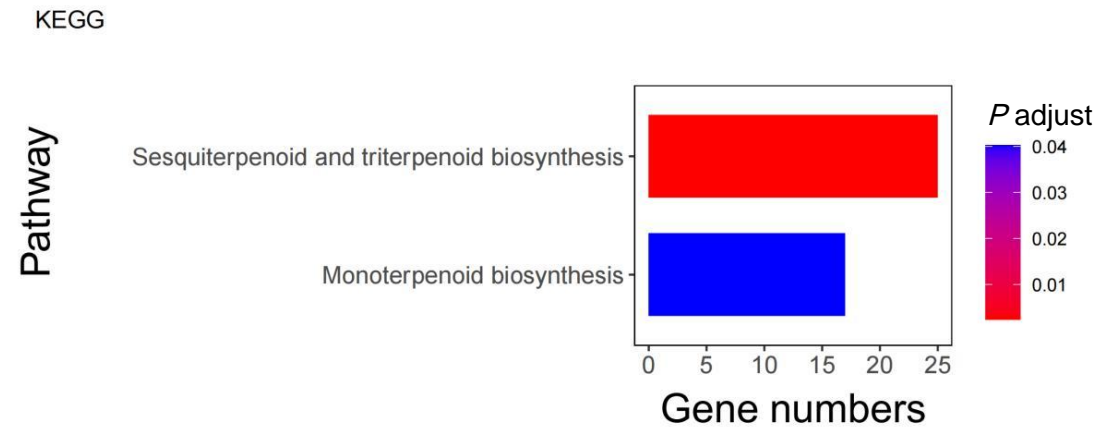

Supplementary Figure 43. GO and KEGG enrichment of selective genes specific to tetraploid *C. paliurus*.
